# Supplementary material for: Structural and Electrical Characterization of LaSrAl1−xMgxO4−δ Layered Perovskites Obtained by Mechanical Synthesis
Source: MDPI journal article supplement (doi:10.3390/ma16247564), 2023-12-08
Supplement: s1 [file s1]

Carlos Marinio

Author: Paula  
Creation: 09/23/2019 2:33:37 PM  
Sample Name: P-SM-AI

**Area 1**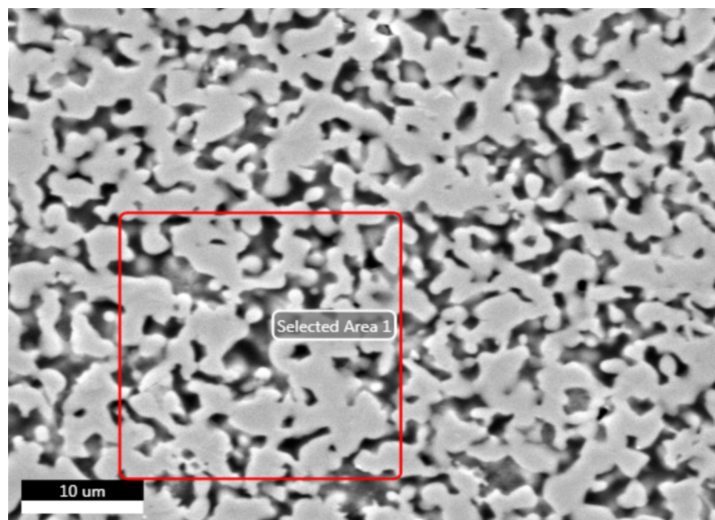

Notes:

Selected Area 1

kV: 20      Mag: 5007      Takeoff: 35.2      Live Time(s): 30      Amp Time(μs): 3.84      Resolution:(eV) 123.8

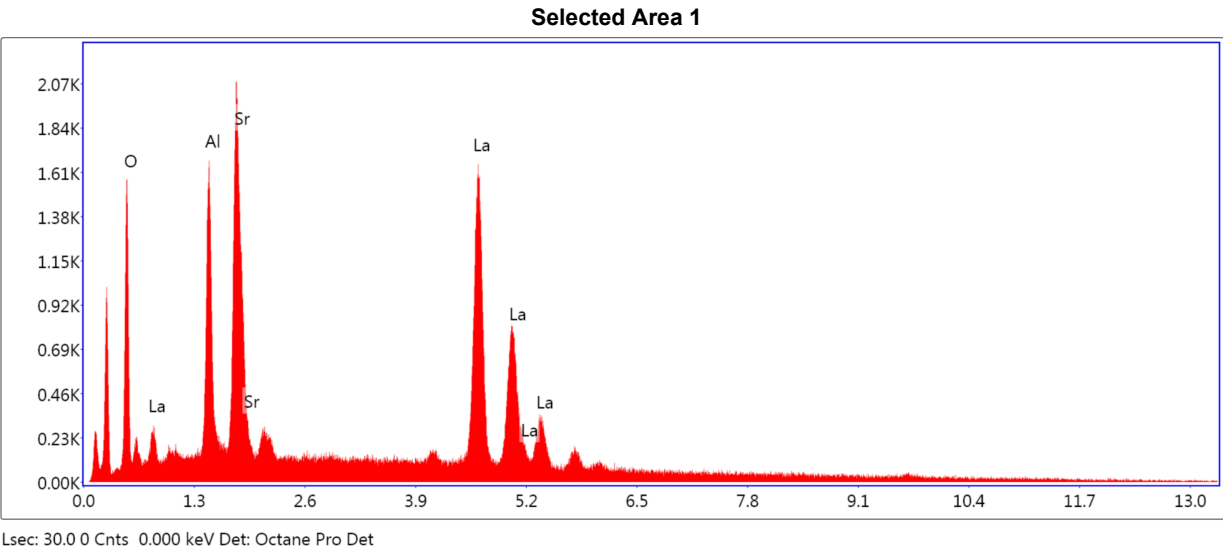

**eZAF Smart Quant Results**

| Element | Weight % | Atomic % | Net Int. | Error % | Kratio | Z      | R      | A      | F      |
|---------|----------|----------|----------|---------|--------|--------|--------|--------|--------|
| O K     | 17.0     | 50.6     | 507.4    | 9.3     | 0.0594 | 1.3303 | 0.8174 | 0.2621 | 1.0000 |
| AlK     | 11.4     | 20.0     | 754.4    | 8.4     | 0.0506 | 1.1971 | 0.8671 | 0.3689 | 1.0063 |
| SrL     | 24.1     | 13.1     | 932.8    | 5.8     | 0.1391 | 0.9414 | 1.0332 | 0.6068 | 1.0101 |
| LaL     | 47.5     | 16.2     | 1213.1   | 3.0     | 0.4242 | 0.8514 | 1.1183 | 1.0173 | 1.0316 |

Carlos Marinio

Author: Paula  
Creation: 09/23/2019 2:11:05 PM  
Sample Name: New Sample

**Area 1**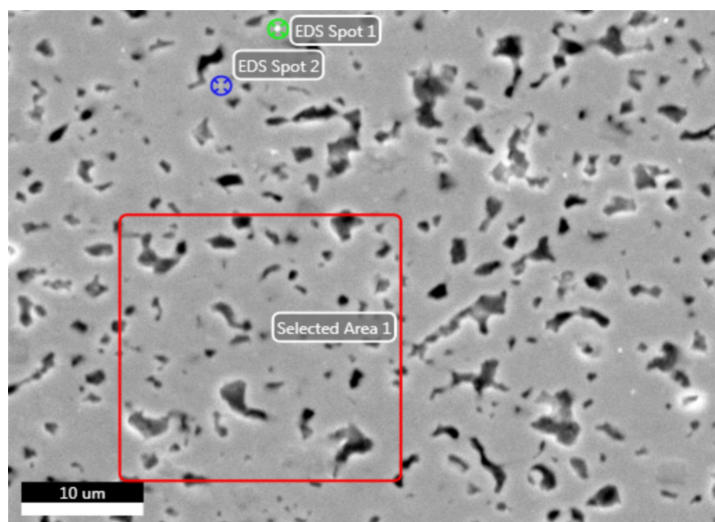

Notes:

Selected Area 1

kV: 20      Mag: 5007      Takeoff: 35.2      Live Time(s): 30      Amp Time(μs): 3.84      Resolution:(eV) 123.8

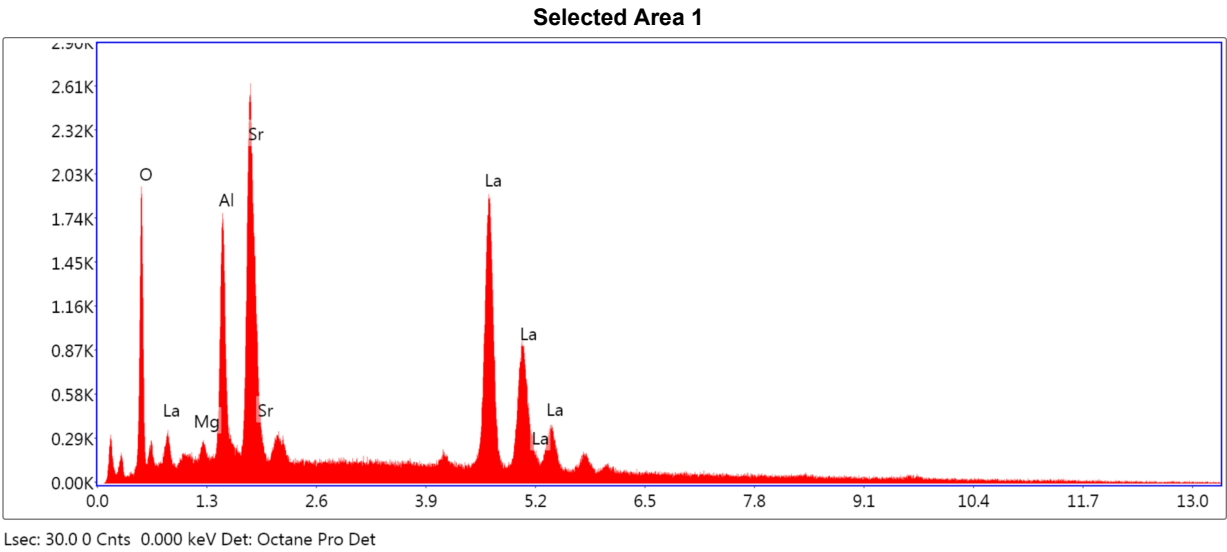

**eZAF Smart Quant Results**

| Element | Weight % | Atomic % | Net Int. | Error % | Kratio | Z      | R      | A      | F      |
|---------|----------|----------|----------|---------|--------|--------|--------|--------|--------|
| O K     | 17.4     | 50.8     | 619.9    | 9.2     | 0.0593 | 1.3250 | 0.8199 | 0.2577 | 1.0000 |
| MgK     | 1.5      | 2.8      | 93.2     | 12.5    | 0.0051 | 1.2354 | 0.8604 | 0.2786 | 1.0047 |
| AlK     | 10.1     | 17.4     | 816.7    | 8.3     | 0.0447 | 1.1922 | 0.8696 | 0.3704 | 1.0064 |
| SrL     | 25.5     | 13.6     | 1222.4   | 5.6     | 0.1488 | 0.9376 | 1.0361 | 0.6162 | 1.0098 |
| LaL     | 45.6     | 15.3     | 1420.3   | 2.7     | 0.4057 | 0.8478 | 1.1209 | 1.0173 | 1.0319 |



EDS Spot 1

kV: 20      Mag: 5007      Takeoff: 35.2      Live Time(s): 30      Amp Time(μs): 3.84      Resolution:(eV) 123.8

EDS Spot 1

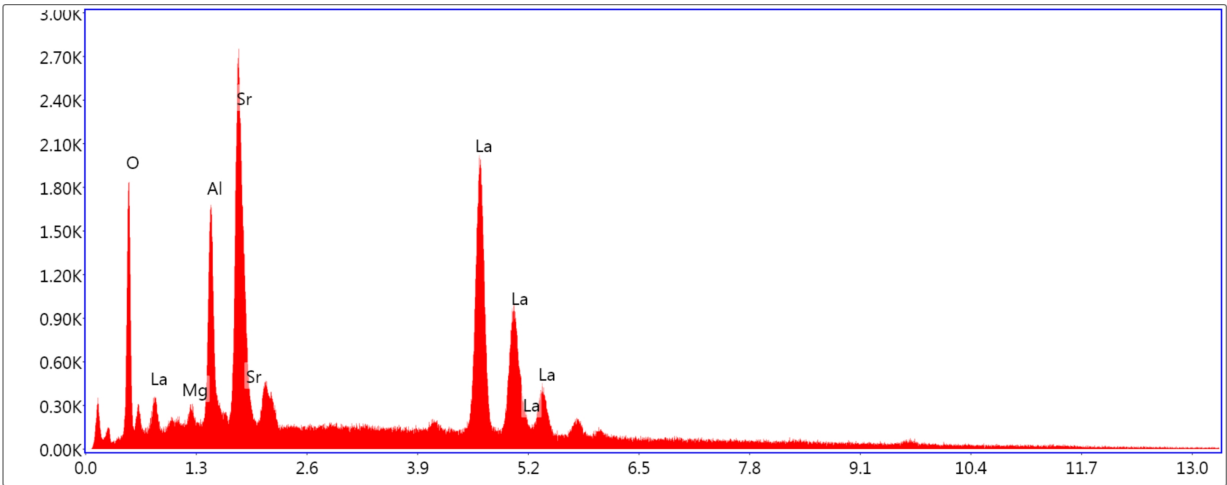

Lsec: 30.0 0 Cnts 0.000 keV Det: Octane Pro Det

**eZAF Smart Quant Results**

| Element | Weight % | Atomic % | Net Int. | Error % | Kratio | Z      | R      | A      | F      |
|---------|----------|----------|----------|---------|--------|--------|--------|--------|--------|
| O K     | 16.7     | 50.0     | 610.5    | 9.2     | 0.0573 | 1.3316 | 0.8166 | 0.2577 | 1.0000 |
| MgK     | 1.6      | 3.3      | 104.9    | 12.4    | 0.0056 | 1.2416 | 0.8570 | 0.2744 | 1.0046 |
| AlK     | 9.4      | 16.7     | 767.8    | 8.4     | 0.0412 | 1.1982 | 0.8663 | 0.3646 | 1.0064 |
| SrL     | 25.4     | 13.9     | 1242.1   | 5.6     | 0.1483 | 0.9423 | 1.0322 | 0.6126 | 1.0099 |
| LaL     | 46.8     | 16.2     | 1493.2   | 2.7     | 0.4184 | 0.8523 | 1.1174 | 1.0162 | 1.0317 |

EDS Spot 2

kV: 20      Mag: 5007      Takeoff: 35.2      Live Time(s): 8      Amp Time(μs): 3.84      Resolution:(eV) 123.8

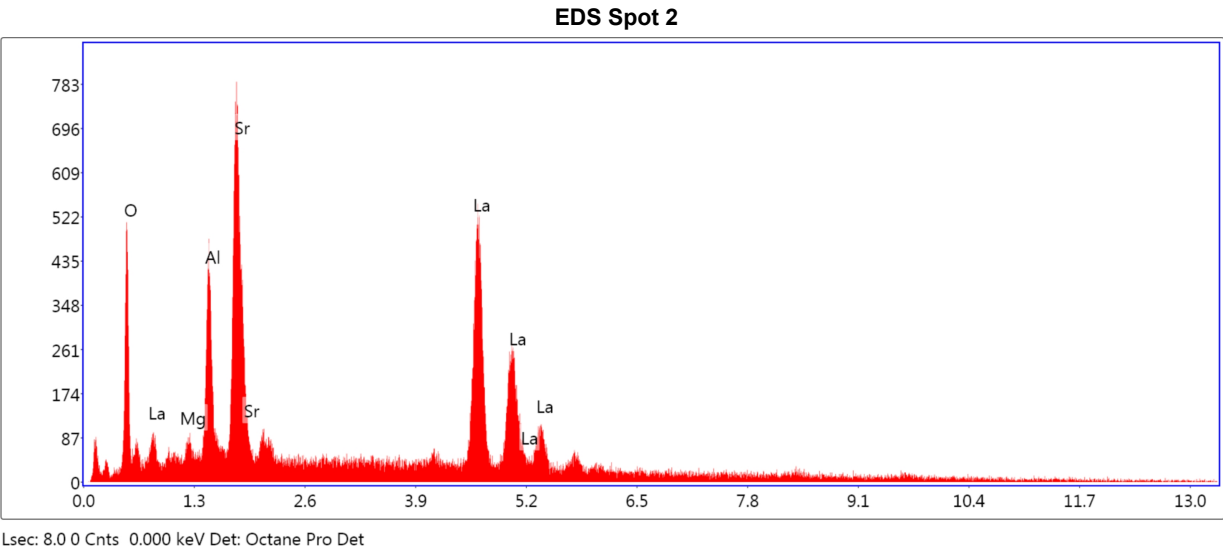

**eZAF Smart Quant Results**

| Element | Weight % | Atomic % | Net Int. | Error % | Kratio | Z      | R      | A      | F      |
|---------|----------|----------|----------|---------|--------|--------|--------|--------|--------|
| O K     | 17.0     | 50.6     | 609.3    | 10.2    | 0.0569 | 1.3297 | 0.8176 | 0.2521 | 1.0000 |
| MgK     | 1.6      | 3.2      | 105.0    | 17.2    | 0.0056 | 1.2398 | 0.8580 | 0.2787 | 1.0047 |
| AlK     | 9.1      | 16.0     | 756.6    | 9.4     | 0.0404 | 1.1965 | 0.8673 | 0.3699 | 1.0066 |
| SrL     | 27.0     | 14.7     | 1338.9   | 6.5     | 0.1590 | 0.9409 | 1.0334 | 0.6207 | 1.0096 |
| LaL     | 45.4     | 15.6     | 1452.5   | 4.9     | 0.4047 | 0.8510 | 1.1185 | 1.0154 | 1.0319 |

Carlos Marinio

Author: Paula  
Creation: 09/24/2019 10:07:16 AM  
Sample Name: Mg-02-SM

**Area 1**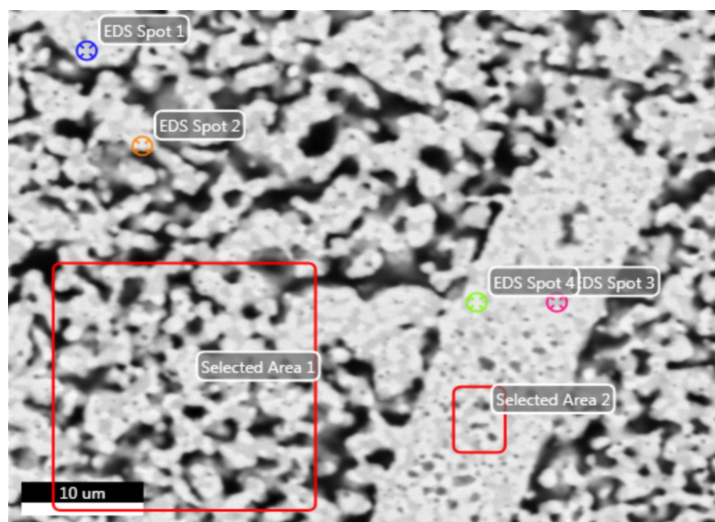

Notes:

## Selected Area 1

kV: 20      Mag: 5007      Takeoff: 35.2      Live Time(s): 30      Amp Time(μs): 3.84      Resolution:(eV) 123.8

## Selected Area 1

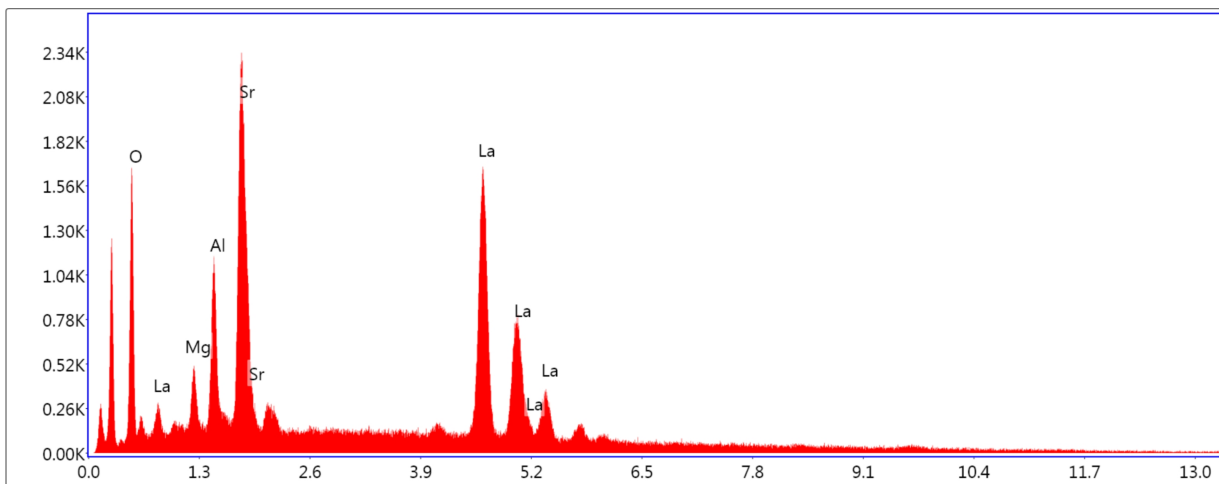

Lsec: 30.0 0 Cnts 0.000 keV Det: Octane Pro Det

**eZAF Smart Quant Results**

| Element | Weight % | Atomic % | Net Int. | Error % | Kratio | Z      | R      | A      | F      |
|---------|----------|----------|----------|---------|--------|--------|--------|--------|--------|
| O K     | 17.1     | 50.4     | 527.9    | 9.3     | 0.0584 | 1.3265 | 0.8186 | 0.2571 | 1.0000 |
| MgK     | 3.8      | 7.3      | 206.1    | 10.4    | 0.0131 | 1.2368 | 0.8591 | 0.2777 | 1.0044 |
| AlK     | 7.3      | 12.7     | 496.7    | 8.8     | 0.0314 | 1.1936 | 0.8683 | 0.3597 | 1.0065 |
| SrL     | 26.1     | 14.0     | 1086.0   | 5.7     | 0.1529 | 0.9387 | 1.0346 | 0.6189 | 1.0098 |
| LaL     | 45.8     | 15.5     | 1234.8   | 2.9     | 0.4075 | 0.8489 | 1.1195 | 1.0169 | 1.0319 |

## Selected Area 2

kV: 20      Mag: 5007      Takeoff: 35.2      Live Time(s): 30      Amp Time(μs): 3.84      Resolution:(eV) 123.8

## Selected Area 2

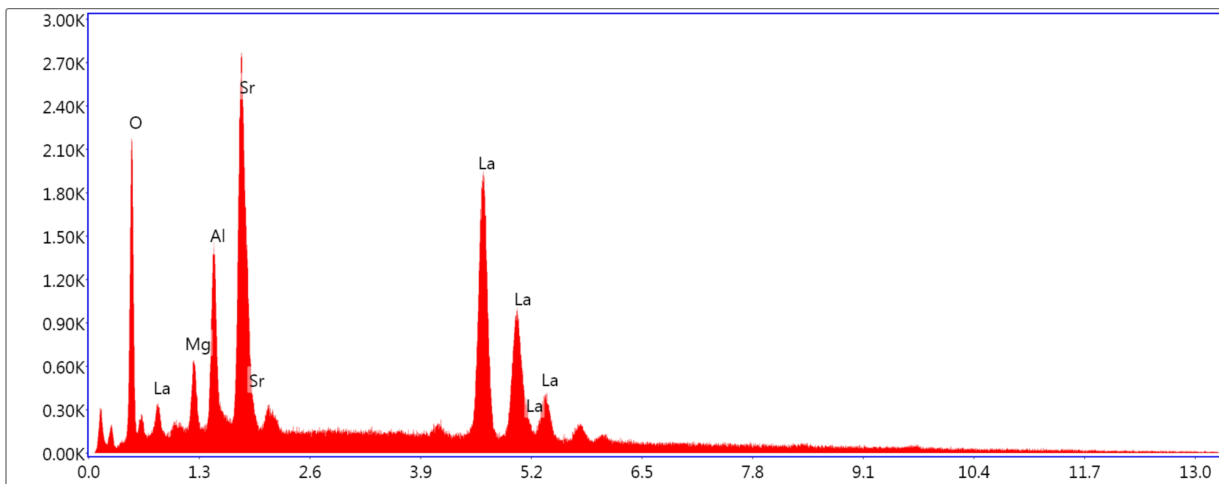

Lsec: 30.0 0 Cnts 0.000 keV Det: Octane Pro Det

**eZAF Smart Quant Results**

| Element | Weight % | Atomic % | Net Int. | Error % | Kratio | Z      | R      | A      | F      |
|---------|----------|----------|----------|---------|--------|--------|--------|--------|--------|
| O K     | 18.6     | 52.4     | 709.9    | 9.1     | 0.0640 | 1.3156 | 0.8237 | 0.2623 | 1.0000 |
| MgK     | 3.9      | 7.2      | 258.8    | 10.1    | 0.0134 | 1.2267 | 0.8642 | 0.2814 | 1.0045 |
| AlK     | 7.8      | 13.0     | 651.7    | 8.5     | 0.0336 | 1.1838 | 0.8735 | 0.3639 | 1.0065 |
| SrL     | 25.2     | 13.0     | 1284.8   | 5.6     | 0.1475 | 0.9310 | 1.0406 | 0.6222 | 1.0098 |
| LaL     | 44.6     | 14.5     | 1468.2   | 2.7     | 0.3951 | 0.8415 | 1.1249 | 1.0197 | 1.0320 |

EDS Spot 1

kV: 20      Mag: 5007      Takeoff: 35.2      Live Time(s): 30      Amp Time(μs): 3.84      Resolution:(eV) 123.8

EDS Spot 1

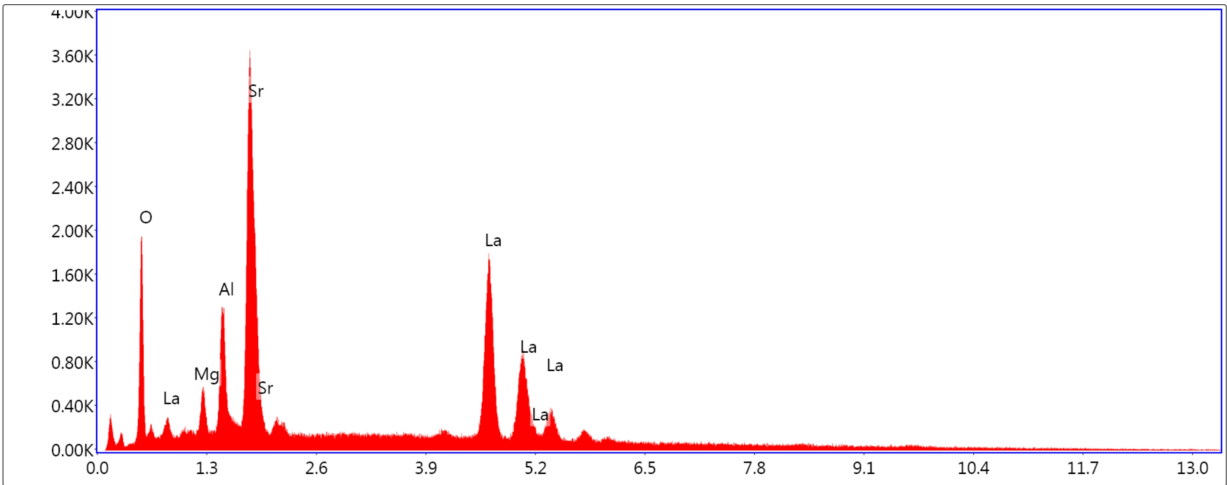

Lsec: 30.0 0 Cnts 0.000 keV Det: Octane Pro Det

**eZAF Smart Quant Results**

| Element | Weight % | Atomic % | Net Int. | Error % | Kratio | Z      | R      | A      | F      |
|---------|----------|----------|----------|---------|--------|--------|--------|--------|--------|
| O K     | 18.4     | 52.9     | 626.1    | 9.4     | 0.0571 | 1.3182 | 0.8231 | 0.2355 | 1.0000 |
| MgK     | 2.9      | 5.5      | 204.8    | 10.6    | 0.0107 | 1.2291 | 0.8636 | 0.2965 | 1.0048 |
| AlK     | 6.8      | 11.5     | 597.5    | 8.4     | 0.0311 | 1.1861 | 0.8729 | 0.3855 | 1.0072 |
| SrL     | 32.2     | 16.9     | 1709.6   | 5.1     | 0.1982 | 0.9327 | 1.0399 | 0.6539 | 1.0087 |
| LaL     | 39.7     | 13.2     | 1290.3   | 2.8     | 0.3507 | 0.8431 | 1.1243 | 1.0140 | 1.0329 |

EDS Spot 2

kV: 20      Mag: 5007      Takeoff: 35.2      Live Time(s): 30      Amp Time(μs): 3.84      Resolution:(eV) 123.8

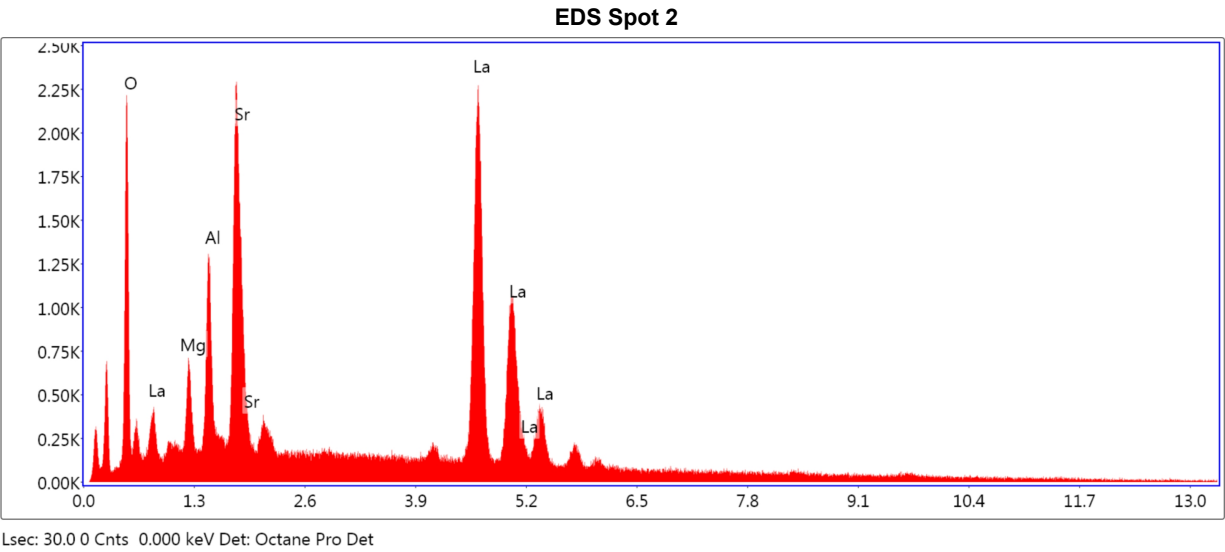

**eZAF Smart Quant Results**

| Element | Weight % | Atomic % | Net Int. | Error % | Kratio | Z      | R      | A      | F      |
|---------|----------|----------|----------|---------|--------|--------|--------|--------|--------|
| O K     | 17.5     | 50.9     | 729.5    | 8.9     | 0.0652 | 1.3249 | 0.8186 | 0.2806 | 1.0000 |
| MgK     | 4.6      | 8.8      | 298.8    | 10.2    | 0.0153 | 1.2354 | 0.8591 | 0.2664 | 1.0042 |
| AlK     | 7.3      | 12.6     | 591.2    | 8.8     | 0.0302 | 1.1922 | 0.8683 | 0.3434 | 1.0061 |
| SrL     | 20.9     | 11.1     | 1042.9   | 5.9     | 0.1186 | 0.9376 | 1.0346 | 0.5985 | 1.0107 |
| LaL     | 49.6     | 16.6     | 1661.6   | 2.7     | 0.4429 | 0.8480 | 1.1196 | 1.0213 | 1.0314 |

EDS Spot 3

kV: 20      Mag: 5007      Takeoff: 35.2      Live Time(s): 30      Amp Time(μs): 3.84      Resolution:(eV) 123.8

EDS Spot 3

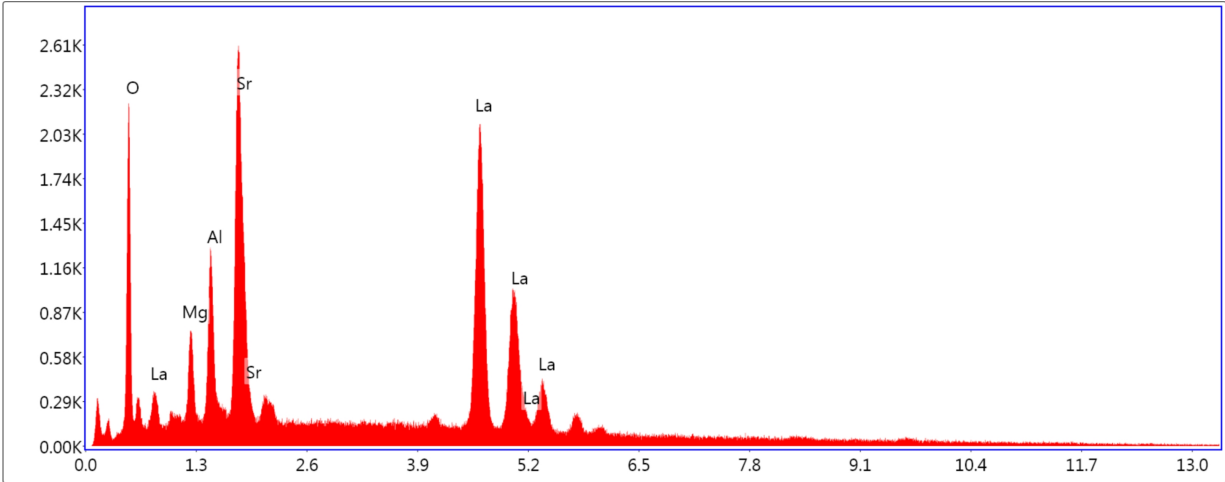

Lsec: 30.0 0 Cnts 0.000 keV Det: Octane Pro Det

**eZAF Smart Quant Results**

| Element | Weight % | Atomic % | Net Int. | Error % | Kratio | Z      | R      | A      | F      |
|---------|----------|----------|----------|---------|--------|--------|--------|--------|--------|
| O K     | 18.1     | 51.6     | 720.6    | 9.0     | 0.0642 | 1.3194 | 0.8215 | 0.2694 | 1.0000 |
| MgK     | 4.8      | 9.0      | 320.6    | 10.1    | 0.0164 | 1.2303 | 0.8620 | 0.2754 | 1.0043 |
| AlK     | 6.9      | 11.7     | 574.0    | 8.7     | 0.0292 | 1.1872 | 0.8713 | 0.3531 | 1.0063 |
| SrL     | 23.6     | 12.3     | 1203.0   | 5.7     | 0.1364 | 0.9337 | 1.0380 | 0.6131 | 1.0101 |
| LaL     | 46.6     | 15.3     | 1558.1   | 2.7     | 0.4141 | 0.8442 | 1.1226 | 1.0203 | 1.0318 |



EDS Spot 4

kV: 20      Mag: 5007      Takeoff: 35.2      Live Time(s): 30      Amp Time(μs): 3.84      Resolution:(eV) 123.8

EDS Spot 4

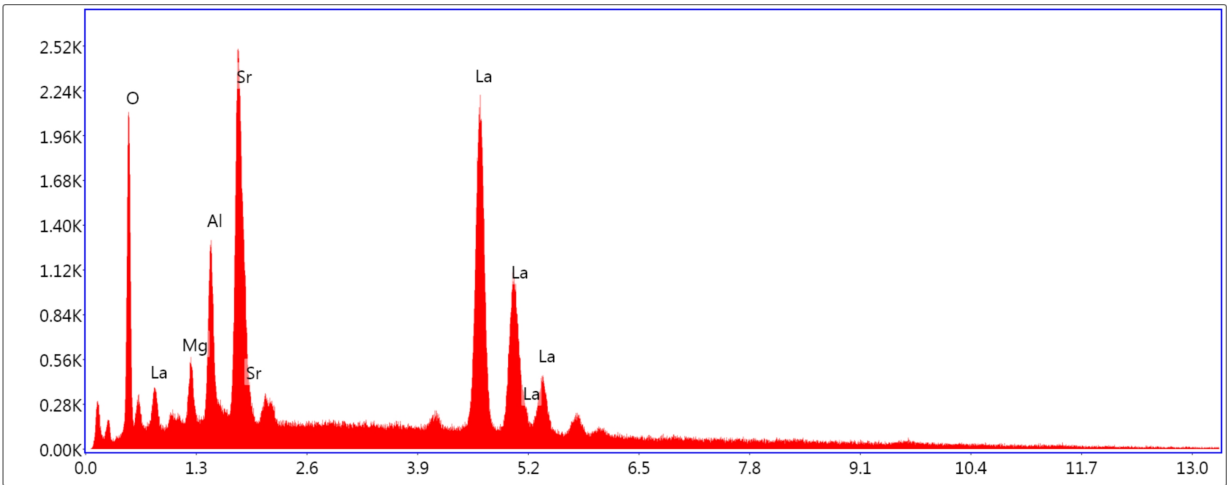

Lsec: 30.0 0 Cnts 0.000 keV Det: Octane Pro Det

eZAF Smart Quant Results

| Element | Weight % | Atomic % | Net Int. | Error % | Kratio | Z      | R      | A      | F      |
|---------|----------|----------|----------|---------|--------|--------|--------|--------|--------|
| O K     | 17.4     | 51.4     | 700.9    | 9.0     | 0.0625 | 1.3300 | 0.8164 | 0.2706 | 1.0000 |
| MgK     | 3.5      | 6.8      | 228.0    | 10.4    | 0.0117 | 1.2401 | 0.8568 | 0.2674 | 1.0043 |
| AlK     | 7.2      | 12.7     | 596.0    | 8.7     | 0.0304 | 1.1968 | 0.8661 | 0.3489 | 1.0063 |
| SrL     | 23.0     | 12.4     | 1169.2   | 5.7     | 0.1326 | 0.9412 | 1.0319 | 0.6056 | 1.0104 |
| LaL     | 48.9     | 16.7     | 1644.4   | 2.6     | 0.4373 | 0.8514 | 1.1172 | 1.0188 | 1.0315 |

Carlos Marinio

Author: Paula  
Creation: 09/24/2019 11:03:02 AM  
Sample Name: Mg-03-SM

**Area 1**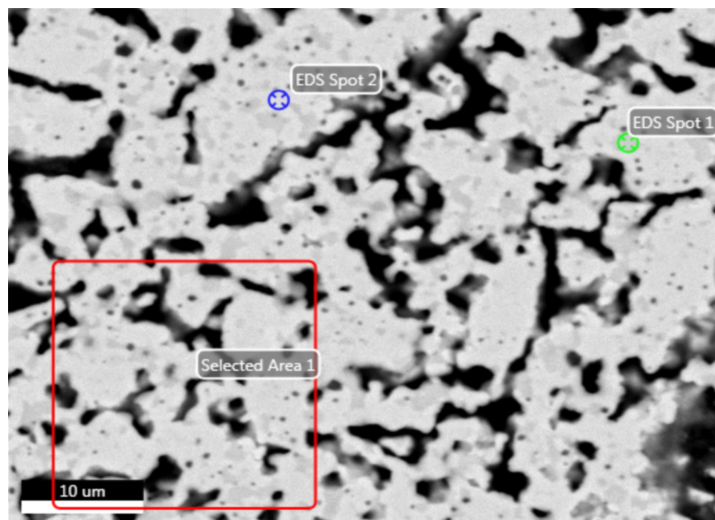

Notes:

Selected Area 1

kV: 20      Mag: 5007      Takeoff: 35.2      Live Time(s): 30      Amp Time(μs): 3.84      Resolution:(eV) 123.8

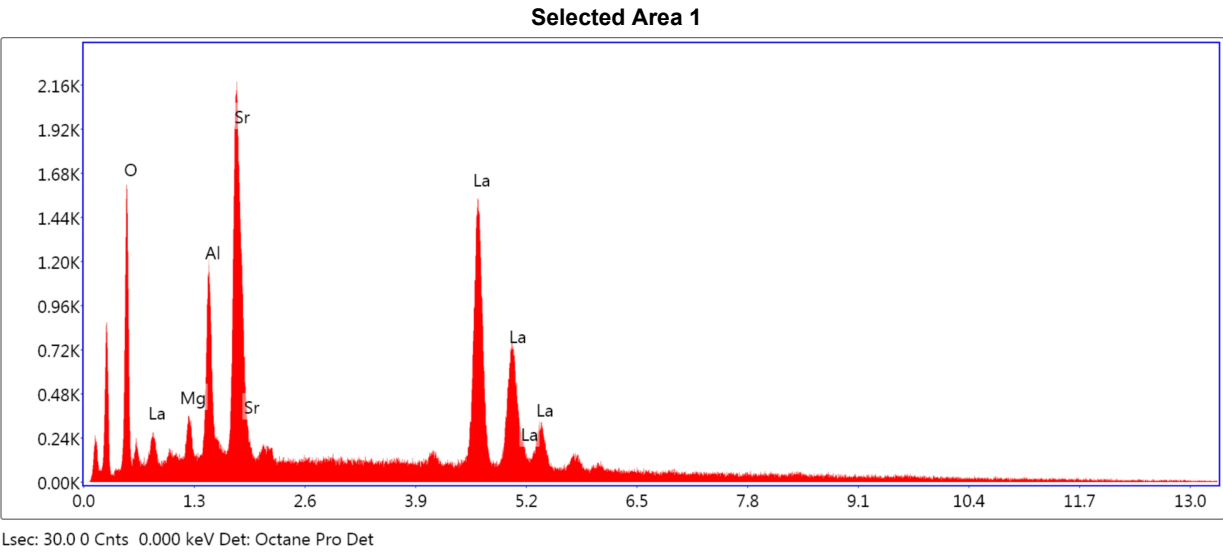

**eZAF Smart Quant Results**

| Element | Weight % | Atomic % | Net Int. | Error % | Kratio | Z      | R      | A      | F      |
|---------|----------|----------|----------|---------|--------|--------|--------|--------|--------|
| O K     | 18.0     | 52.1     | 522.5    | 9.3     | 0.0615 | 1.3225 | 0.8206 | 0.2582 | 1.0000 |
| MgK     | 2.7      | 5.2      | 140.0    | 11.2    | 0.0094 | 1.2331 | 0.8611 | 0.2789 | 1.0045 |
| AlK     | 8.1      | 14.0     | 530.2    | 8.6     | 0.0357 | 1.1900 | 0.8703 | 0.3656 | 1.0065 |
| SrL     | 25.9     | 13.7     | 1017.5   | 5.7     | 0.1523 | 0.9358 | 1.0369 | 0.6215 | 1.0097 |
| LaL     | 45.2     | 15.1     | 1144.8   | 2.9     | 0.4017 | 0.8462 | 1.1216 | 1.0178 | 1.0320 |

EDS Spot 1

kV: 20      Mag: 5007      Takeoff: 35.2      Live Time(s): 30      Amp Time(μs): 3.84      Resolution:(eV) 123.8

EDS Spot 1

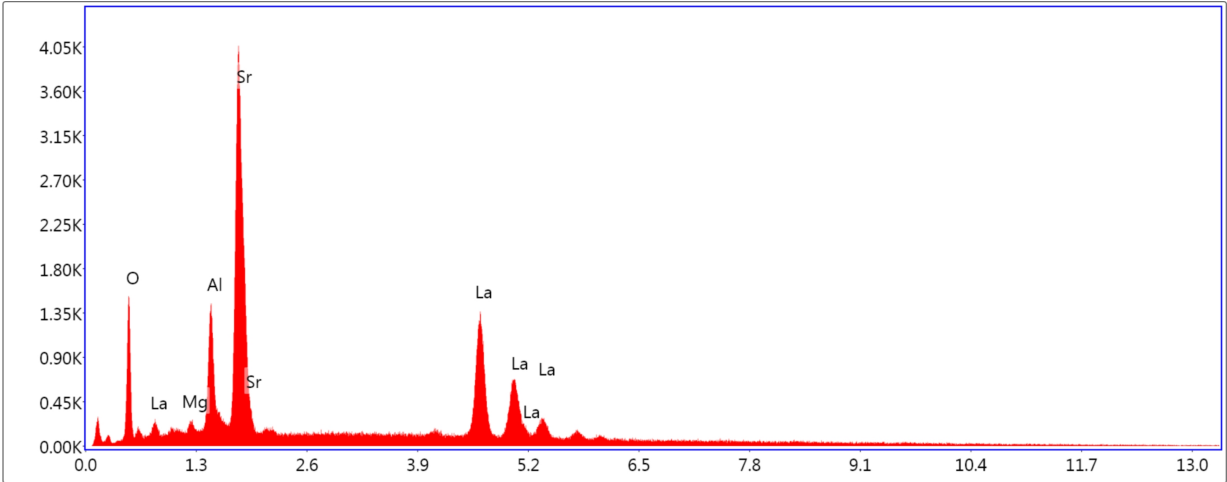

Lsec: 30.0 0 Cnts 0.000 keV Det: Octane Pro Det

**eZAF Smart Quant Results**

| Element | Weight % | Atomic % | Net Int. | Error % | Kratio | Z      | R      | A      | F      |
|---------|----------|----------|----------|---------|--------|--------|--------|--------|--------|
| O K     | 17.9     | 52.5     | 479.2    | 9.8     | 0.0502 | 1.3214 | 0.8227 | 0.2128 | 1.0000 |
| MgK     | 0.8      | 1.6      | 54.8     | 15.6    | 0.0033 | 1.2320 | 0.8632 | 0.3133 | 1.0054 |
| AlK     | 7.5      | 13.1     | 624.8    | 8.0     | 0.0374 | 1.1889 | 0.8725 | 0.4153 | 1.0080 |
| SrL     | 38.9     | 20.9     | 1879.5   | 4.8     | 0.2506 | 0.9349 | 1.0394 | 0.6839 | 1.0079 |
| LaL     | 34.9     | 11.8     | 983.1    | 3.4     | 0.3073 | 0.8451 | 1.1239 | 1.0081 | 1.0341 |

EDS Spot 2

kV: 20      Mag: 5007      Takeoff: 35.2      Live Time(s): 30      Amp Time(μs): 3.84      Resolution:(eV) 123.8

EDS Spot 2

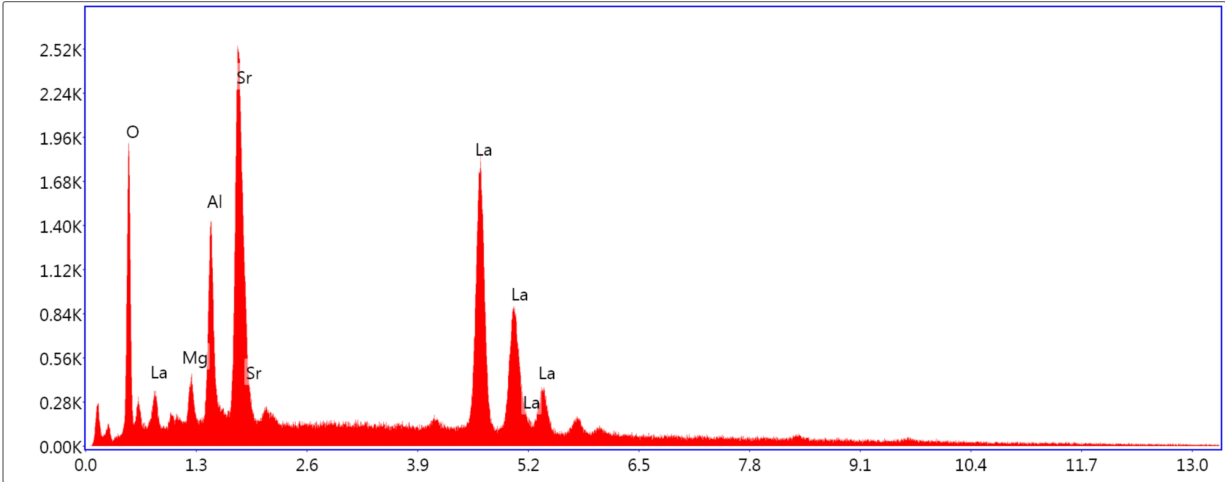

Lsec: 30.0 0 Cnts 0.000 keV Det: Octane Pro Det

**eZAF Smart Quant Results**

| Element | Weight % | Atomic % | Net Int. | Error % | Kratio | Z      | R      | A      | F      |
|---------|----------|----------|----------|---------|--------|--------|--------|--------|--------|
| O K     | 18.3     | 52.5     | 621.7    | 9.2     | 0.0623 | 1.3197 | 0.8219 | 0.2574 | 1.0000 |
| MgK     | 2.7      | 5.0      | 161.9    | 11.0    | 0.0093 | 1.2306 | 0.8624 | 0.2811 | 1.0046 |
| AlK     | 8.3      | 14.1     | 636.3    | 8.5     | 0.0364 | 1.1875 | 0.8717 | 0.3685 | 1.0065 |
| SrL     | 26.2     | 13.7     | 1210.6   | 5.6     | 0.1542 | 0.9339 | 1.0385 | 0.6244 | 1.0097 |
| LaL     | 44.5     | 14.7     | 1322.0   | 2.8     | 0.3950 | 0.8443 | 1.1231 | 1.0181 | 1.0320 |
